# Supplementary material
Source: PubMed Central journal article supplement (PMC5528511)
Supplement: MOL2-8-027-s001.pdf [file MOL2-8-027-s001.pdf]

## **Supplementary Data**

**Dual specificity phosphatase 1 expression inversely correlates with NF- $\kappa$ B activity and expression in prostate cancer and promotes apoptosis through a p38 MAPK dependent mechanism**

Beatriz Gil-Araujo, María-Val Toledo Lobo, María Gutiérrez-Salmerón, Julia Gutiérrez-Pitalúa, Santiago Ropero, Javier C. Angulo, Antonio Chiloehes and Marina Lasa

Supplementary data includes 4 Supplementary Figures

# Supplementary Figure S1 Gil-Araujo *et al.*

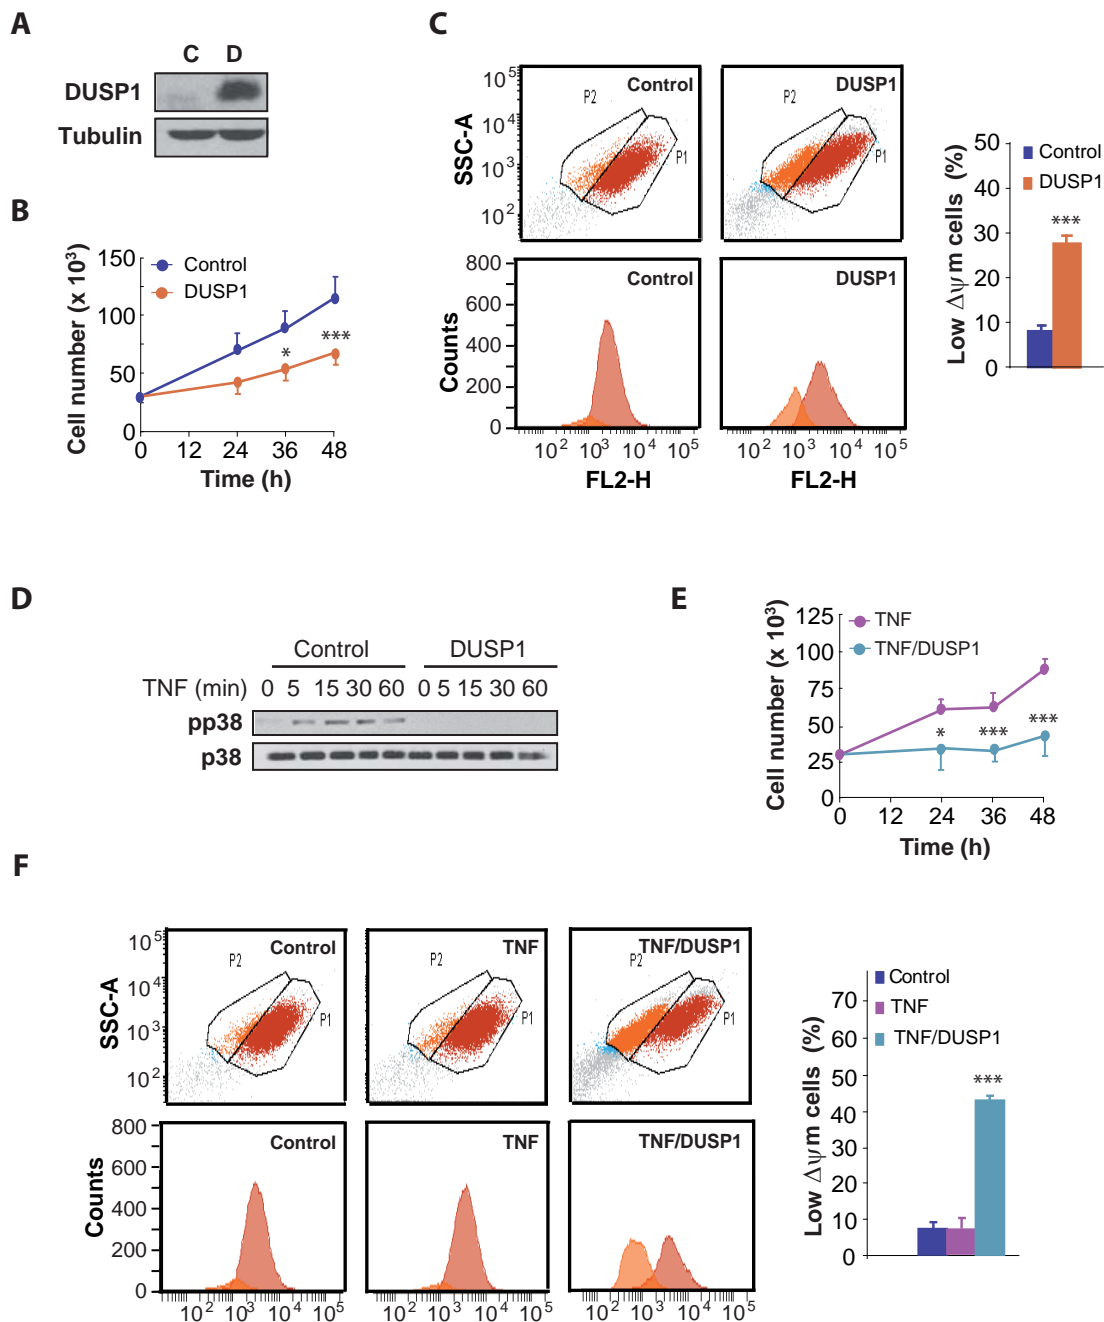

**Supplementary Figure S1 – DUSP1 induces apoptosis in PC3 cells.** (A) Cells were transiently transfected for 48 h with a control vector (C) or a vector encoding DUSP1 (D), and total cellular protein lysates were analysed by western blotting with antibodies against DUSP1 and tubulin, to assess equal loading protein. (B) Cells were transfected for the indicated times as in (A), and counted. The asterisks show the statistical significance of differences between the groups: DUSP1 vs. control. (C) Cells were transfected for 48 h as in (A), and apoptosis was determined by the TMRM assay. (D) Cells were transfected for 48 h as in (A), incubated with TNF- $\alpha$  (10 ng/ml) for the indicated times and total cell lysates were analysed by western blotting with antibodies against both phosphorylated and total p38 MAPK. (E) Cells were transfected for the indicated times as in (A), incubated in the absence or presence of TNF- $\alpha$ , and counted for the indicated times. The asterisks show the statistical significance of differences between the groups: DUSP1 plus TNF- $\alpha$  vs. TNF- $\alpha$ . (F) Cells were transfected as in (A), incubated with TNF- $\alpha$  for 48 h, and apoptosis was determined by the TMRM assay.

Supplementary Figure S2 Gil-Araujo *et al.*

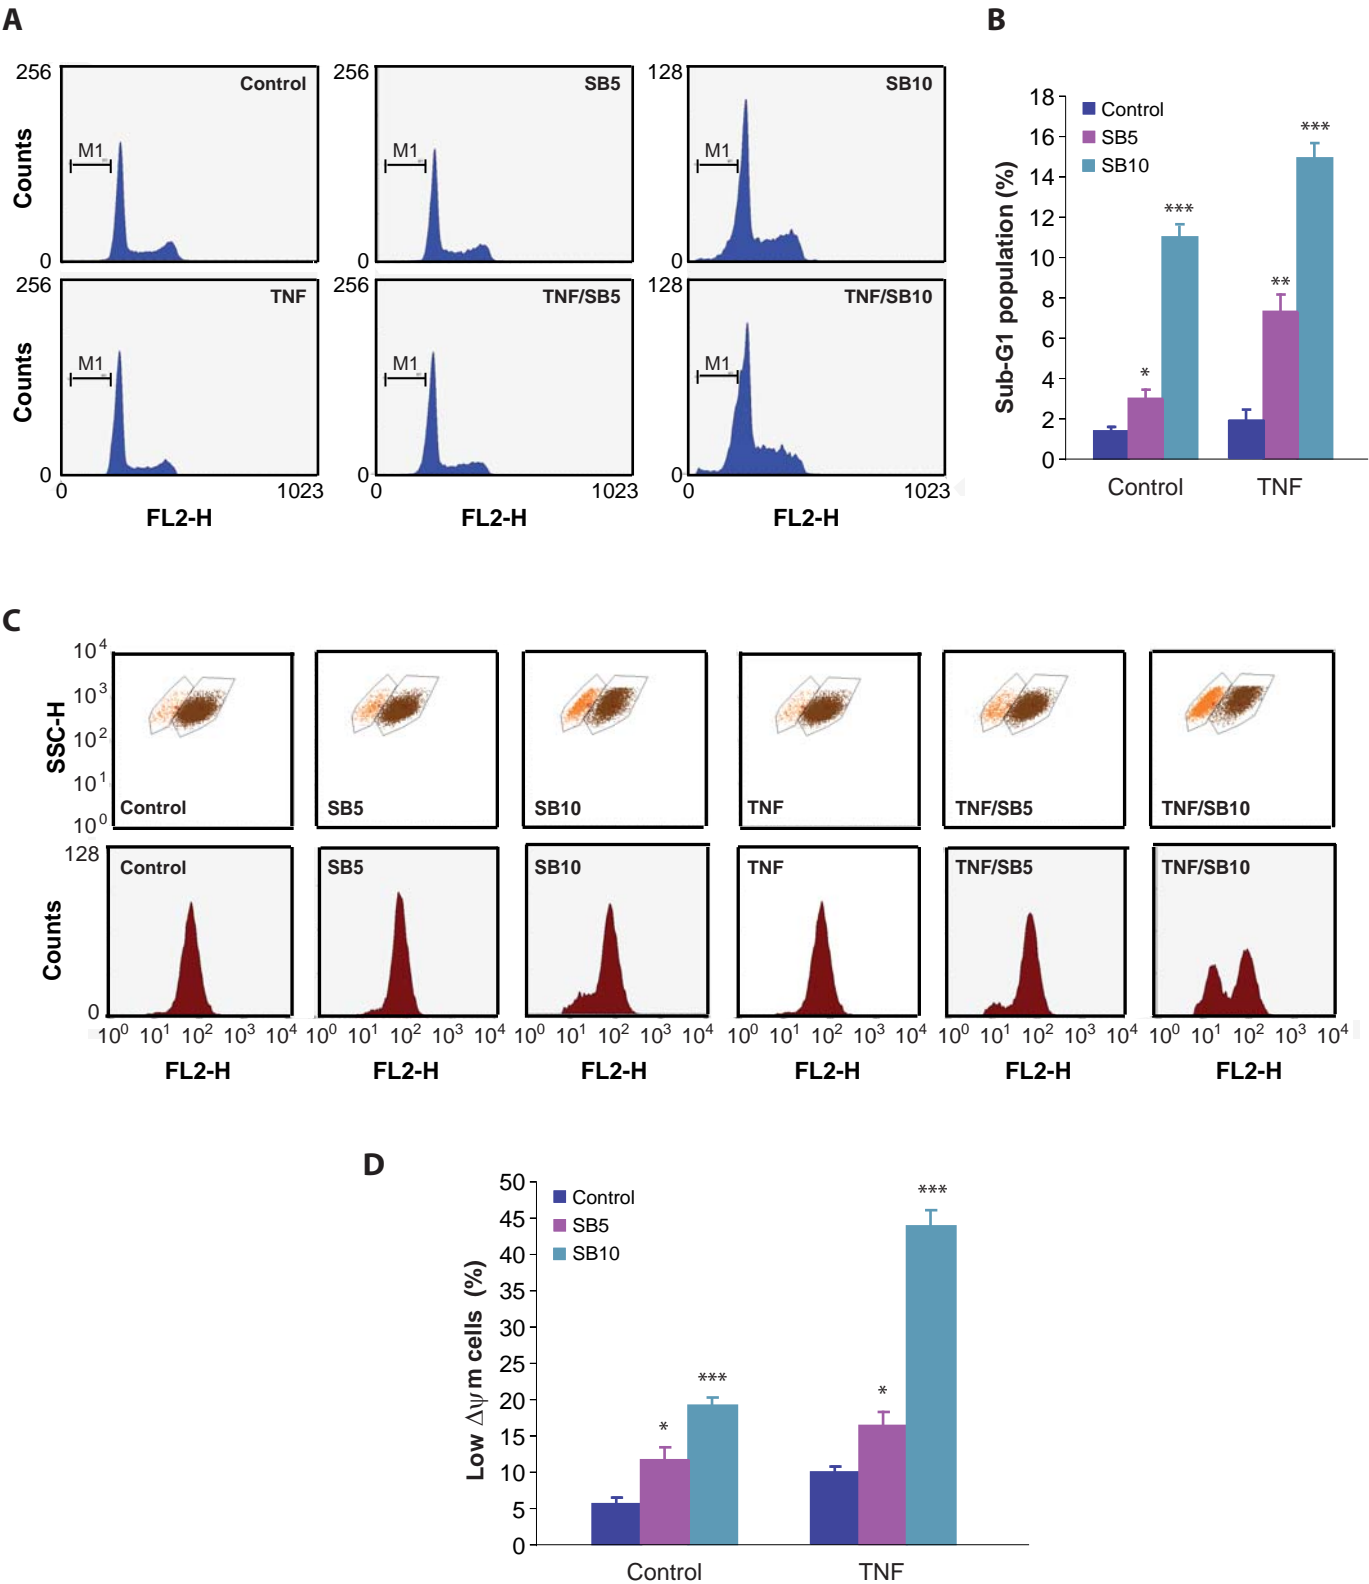

**Supplementary Figure S2 - Effect of SB202190 inhibitor on cellular apoptosis.** DU145 cells were incubated for 48 h with SB202190 (5 or 10  $\mu$ M) in the absence or presence of TNF- $\alpha$  (10 ng/ml). **(A-B)** Measurement of sub-G1 population by PI staining and flow cytometry. The graph shows the quantification of the results from two independent experiments performed in duplicate. **(C-D)** Measurement of population with low  $\Delta\Psi$ m by the TMRM assay. The graph shows the quantification of the results from two independent experiments performed in duplicate.

# Supplementary Figure S3 Gil-Araujo *et al.*

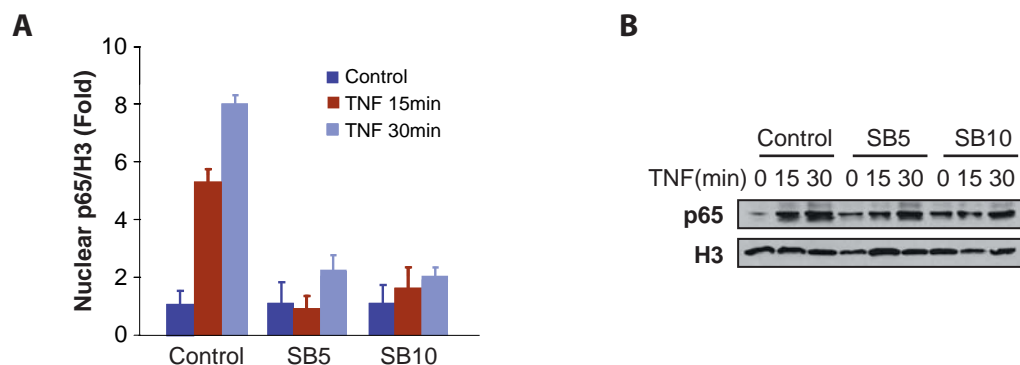

## Supplementary Figure S3 - Effect of SB202190 inhibitor on p65/NF- $\kappa$ B nuclear translocation.

DU145 cells were incubated for 48 h with SB202190 (5 or 10  $\mu$ M), and treated for the indicated times in the absence or presence of TNF- $\alpha$  (10 ng/ml). Nuclear extracts were analysed by western blotting using antibodies against p65. The levels of histone H3 were determined as control to validate the integrity of the nuclear fractions. **(A)** The graph shows the quantification of the ratio of nuclear p65/histone H3 levels from two independent experiments with similar results. **(B)** Representative immunoblot showing nuclear p65 and H3 levels.

**Supplementary Figure S4 Gil-Araujo *et al.***

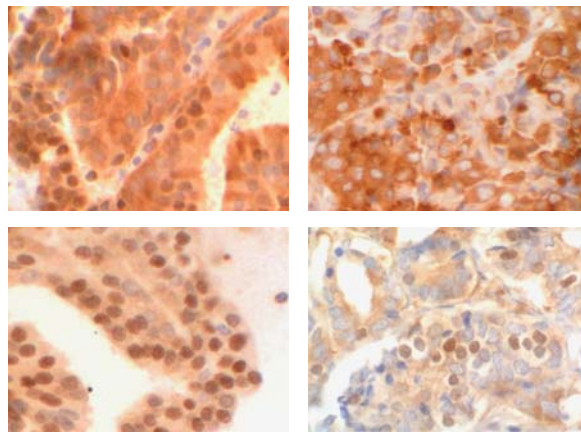

**Supplementary Figure S4 – Immunohistochemical analysis of p65 expression levels from human prostate cancer specimens.** Details of p65 nuclear localization in samples from advanced disease.
